# Supplementary material for: The Opiliones tree of life: shedding light on harvestmen relationships through transcriptomics
Source: PubMed Central journal article supplement (PMC5326524; doi:10.1098/rspb.2016.2340), 2017-02-22

**Color Key  
and Density Plot**

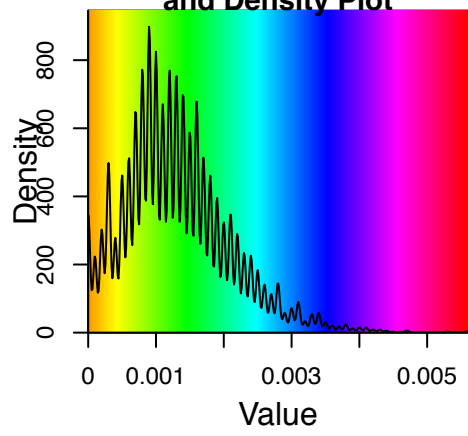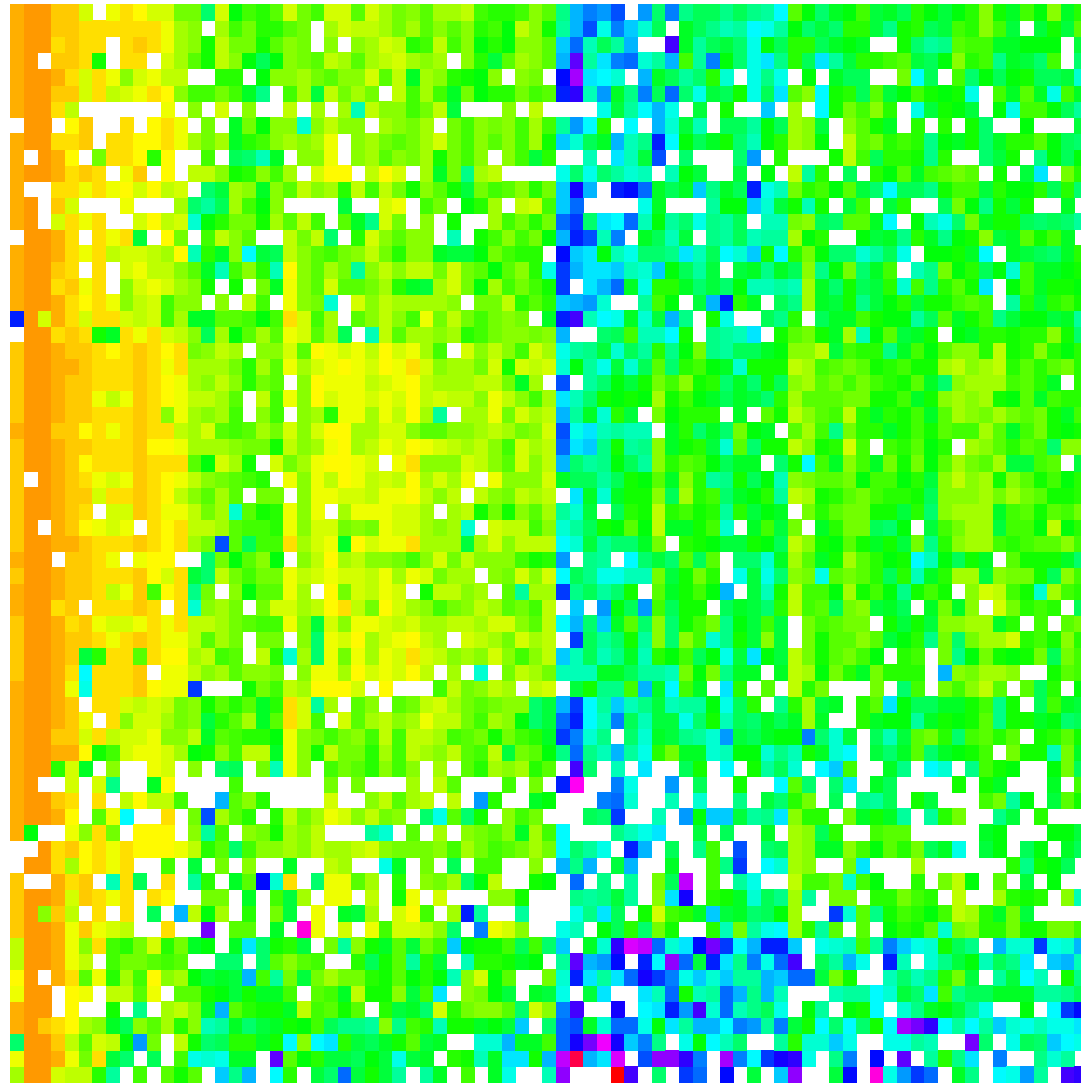

- Hesperonemastom
- Trogulus
- Ortholasma
- Nipponopsalis
- Centruroides
- Acropsopilio
- Thrasychirus
- Protolophus
- Leiobunum
- Homalenotus
- Theromaster
- Pseudocellus
- Nemastomella
- Ricinoides
- Ischryropsalis
- Liphistius
- Suzukielus
- Metagovea
- Stylocellidae
- Aoraki
- Caddo\_pepperella
- Sitalcina
- Petrobunus
- Escadabius
- Vonones
- Pellobunus
- Sclerobunus
- Metabiantes
- Gnomulus
- Protimesius
- Pachylicus
- Pharéciranaus
- Metagyndes
- Dibunus
- Forsteropsalis
- Dampetrus
- Fumontana
- Synthetonychia
- Saramacia
- Zalmoxis
- Metaibalonius
- Fissiphallius
- Larifuga
- Rakaia
- Neopurcellia
- Siro
- Brasilogovea
- Metasiro
- Dicranolasma
- Parasiro
- Sabacon
- Phalangium
- Odiellus
- Gyas
- Idzubius
- Avima
- Chapulobunus
- Pseudopachylus
- Anoplodactylus
- Peripatopsis
- Limulus
- Scutigera
- Eremobates
- Synsphyronus
- Ixodes
- Tetranychus
- Daphnia

gene28  
gene47  
gene7  
gene17  
gene18  
gene19  
gene20  
gene21  
gene22  
gene23  
gene24  
gene25  
gene26  
gene27  
gene28  
gene29  
gene30  
gene31  
gene32  
gene33  
gene34  
gene35  
gene36  
gene37  
gene38  
gene39  
gene40  
gene41  
gene42  
gene43  
gene44  
gene45  
gene46  
gene47  
gene48  
gene49  
gene50  
gene51  
gene52  
gene53  
gene54  
gene55  
gene56  
gene57  
gene58  
gene59  
gene60  
gene61  
gene62  
gene63  
gene64  
gene65  
gene66  
gene67  
gene68  
gene69  
gene70  
gene71  
gene72  
gene73  
gene74  
gene75  
gene76  
gene77  
gene78  
gene79  
gene80  
gene81  
gene82  
gene83  
gene84  
gene85  
gene86  
gene87  
gene88  
gene89  
gene90  
gene91  
gene92  
gene93  
gene94  
gene95  
gene96  
gene97  
gene98  
gene99  
gene100

Color Key  
and Density Plot

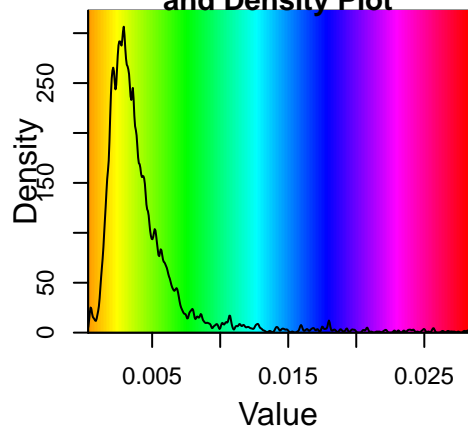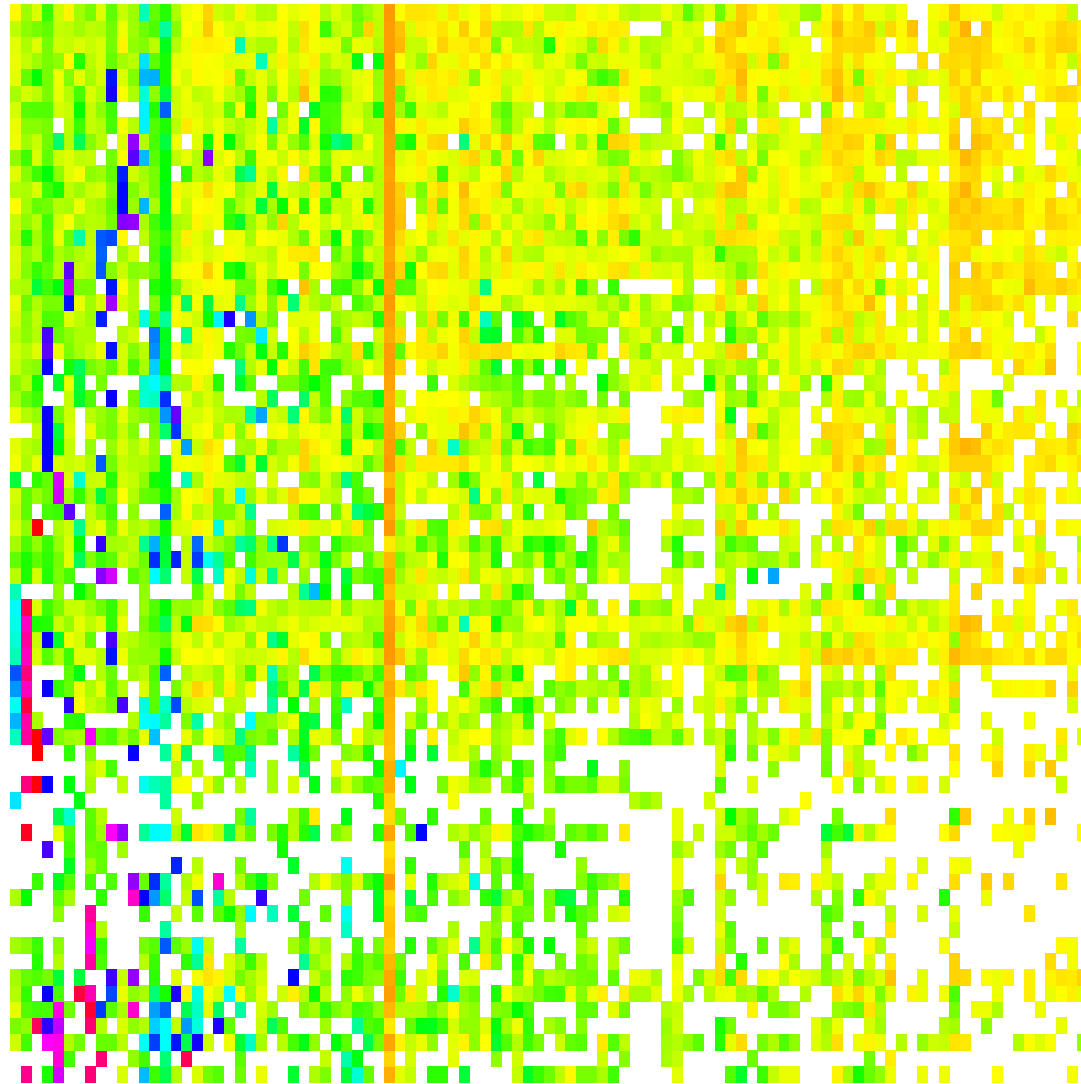

- Trogulus
- Saramacia
- Protimesius
- Hesperonemastoma
- Sitalcina
- Metabiantes
- Rakaia
- Neopurcellia
- Pachylicus
- Siro
- Acropsopilio
- Pellobunus
- Dampetrus
- Phareicranaus
- Brasilogoea
- Leiobunum
- Escadabius
- Sclerobunus
- Ortholasma
- Forsteropsalis
- Protolophus
- Fissiphallius
- Metagyndes
- Caddo\_pepperella
- Scutigera
- Limulus
- Gnomulus
- Zalmoxis
- Petrobunus
- Centruroides
- Suzukielus
- Aoraki
- Dibunus
- Anoplodactylus
- Synsphyronius
- Eremobates
- Pseudopachylus
- Liphistius
- Fumontana
- Metagoea
- Vonones
- Theromaster
- Synthetonychia
- Ischryropsalis
- Phalangium
- Ricinoides
- Odiellus
- Idzubius
- Stylocellidae
- Nemastomella
- Chapulobunus
- Nipponopsalis
- Homalenotus
- Thrasychirus
- Metaibalonius
- Tetranychus
- Sabacon
- Dicranolasma
- Pseudocellus
- Avima
- Larifuga
- Metasiro
- Peripatopsis\_long\_iso
- Ixodes
- Daphnia
- Gyas
- Parasiro

opis 100

Color Key  
and Density Plot

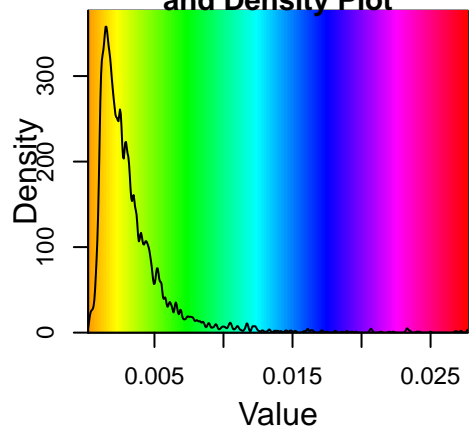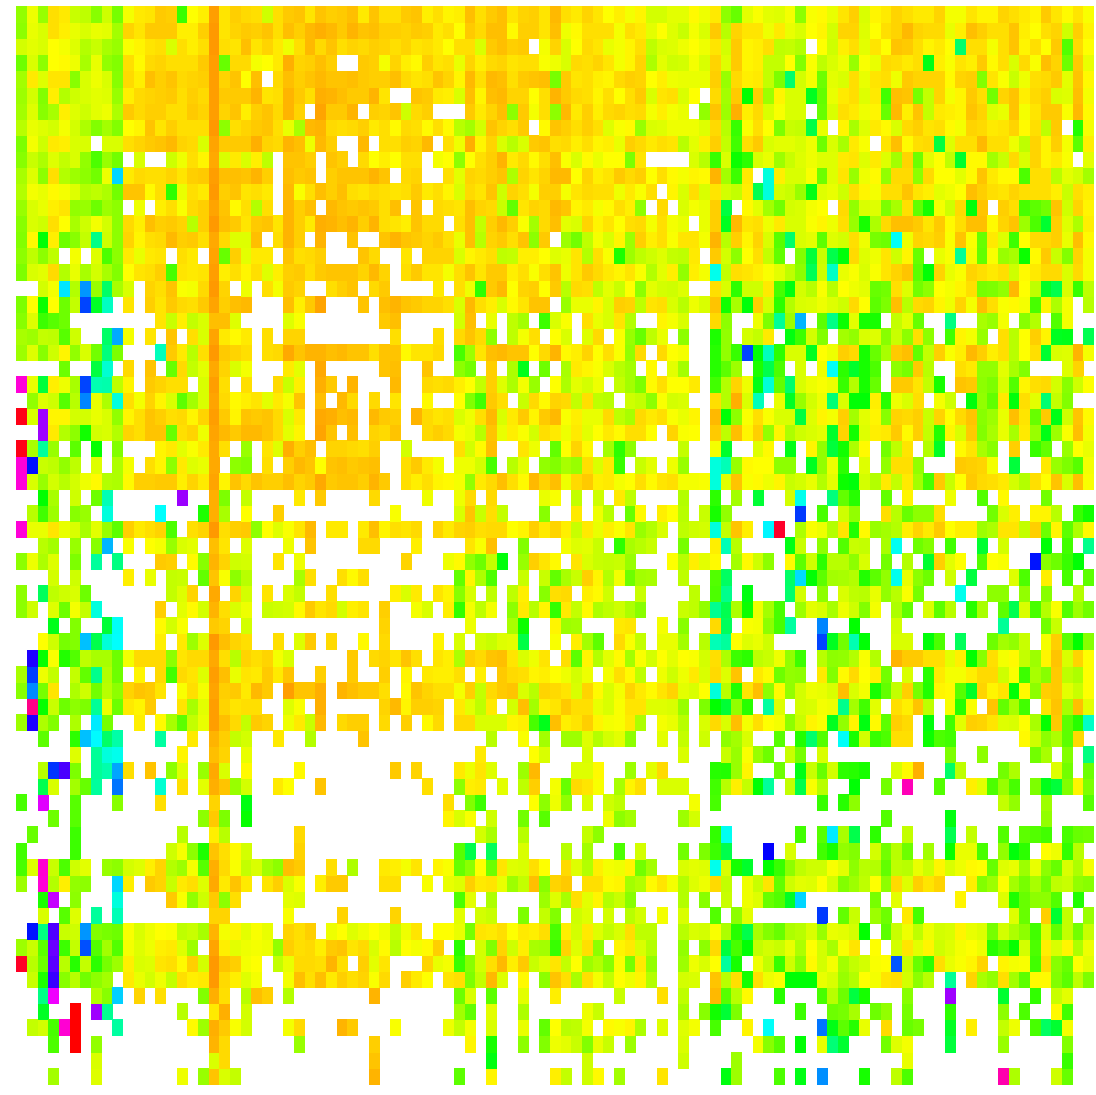

- Trogulus
- Sitalcina
- Siro
- Leiobunum
- Vonones
- Dampetrus
- Escadabius
- Neopurcellia
- Protimesius
- Centruroides
- Pellobunus
- Hesperonemastoma
- Fumontana
- Metabiantes
- Saramacia
- Protolophus
- Ortholasma
- Metagovea
- Phareicranaus
- Pseudopachylus
- Metasiro
- Fissiphallius
- Metagyndes
- Dibunus
- Forsteropsalis
- Petrobunus
- Zalmoxis
- Ricinoides
- Larifuga
- Sclerobunus
- Sabacon
- Theromaster
- Acropsopilio
- Pseudocellus
- Nipponopsalis
- Peripatopsis\_long\_iso
- Eremobates
- Anoplodactylus
- Chapulobunus
- Aoraki
- Brasilogovea
- Suzukiellus
- Pachylicus
- Gnomulus
- Rakaia
- Parasiro
- Thrasychirus
- Metaibalonius
- Phalangium
- Gyas
- Nemastomella
- Tetranychus
- Ixodes
- Daphnia
- Synthetonychia
- Ischyropsalis
- Homalenotus
- Synsphyronus
- Scutigera
- Limulus
- Liphistius
- Avima
- Stylocellidae
- Caddo\_pepperella
- Odiellus
- Dicranolasma
- Idzubius

opist100mic

Color Key  
and Density Plot

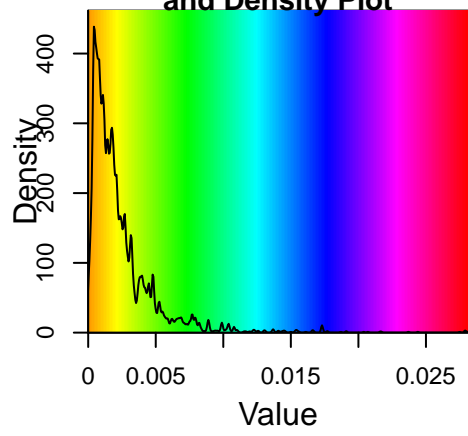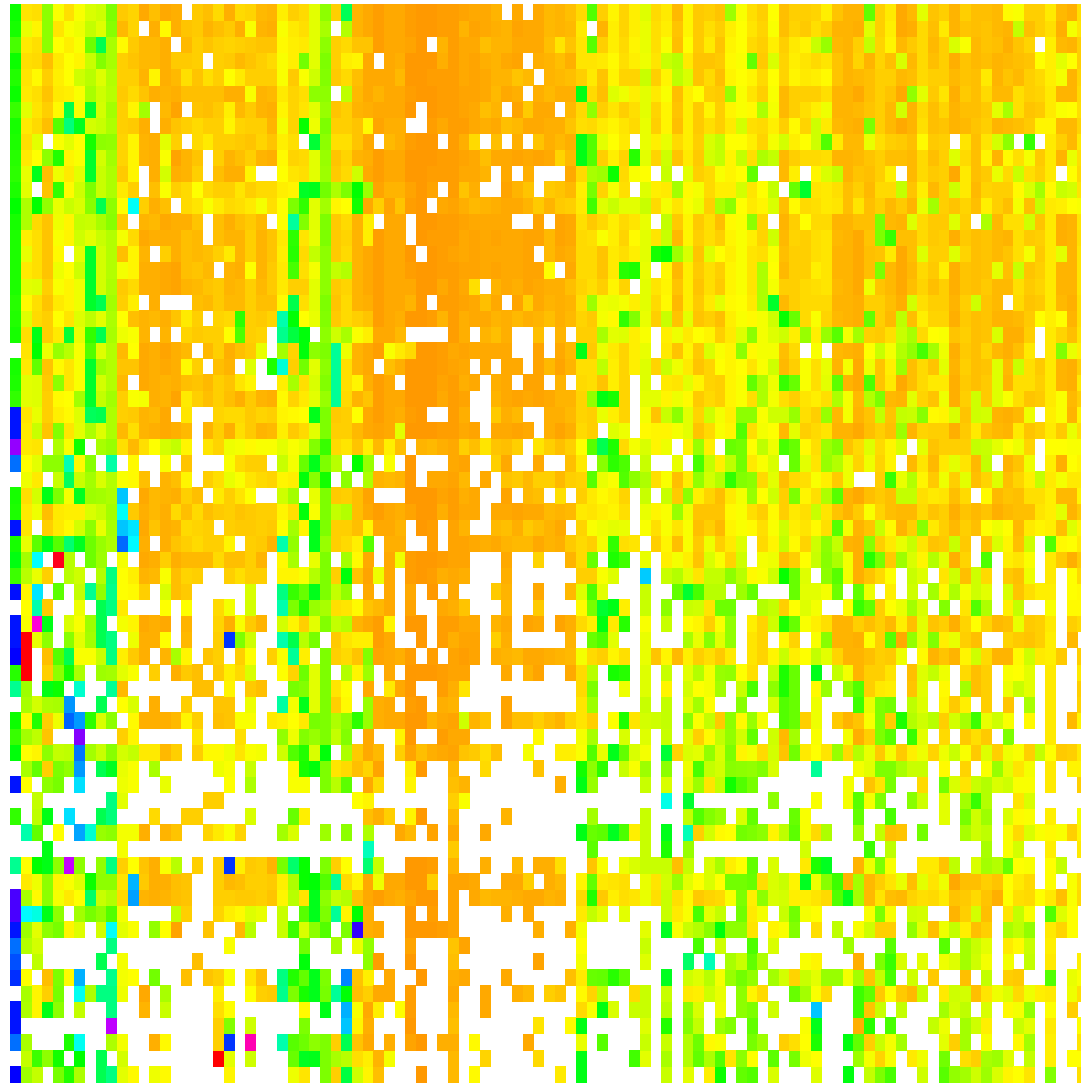

- Sitalcina
- Sclerobunus
- Hesperonemastoma
- Trogulus
- Siro
- Dampetrus
- Saramacia
- Leiobunum
- Centruroides
- Vonones
- Gnomulus
- Limulus
- Synsphyronus
- Fumontana
- Escadabius
- Fissiphallius
- Pellobunus
- Metabiantes
- Protimesius
- Neopurcellia
- Brasilogovea
- Synthetonychia
- Zalmoxis
- Pachylicus
- Pharicranaus
- Rakaia
- Petrobunus
- Anoplodactylus
- Nipponopsalis
- Scutigera
- Metagovea
- Ortholasma
- Suzukielus
- Protolophus
- Larifuga
- Aoraki
- Sabacon
- Peripatopsis\_long\_iso
- Dibunus
- Theromaster
- Forsteropsalis
- Metagyndes
- Metaibalonius
- Pseudocellus
- Ricinoides
- Avima
- Daphnia
- Ixodes
- Stylocellidae
- Gyas
- Thrasychirus
- Eremobates
- Dicranolasma
- Phalangium
- Liphistius
- Acropsopilio
- Caddo\_pepperella
- Pseudopachylus
- Nemastomella
- Idzubius
- Ischyropsalis
- Metasiro
- Parasiro
- Chapulobunus
- Homalenotus
- Tetranychus
- Odiellus

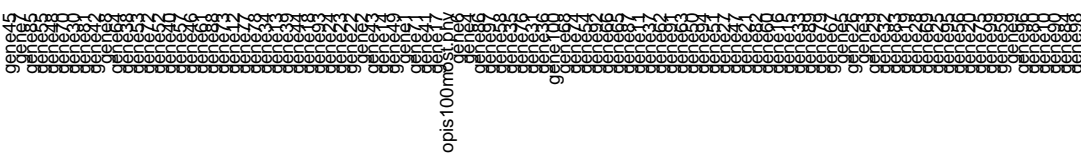

opis 100m

Color Key  
and Density Plot

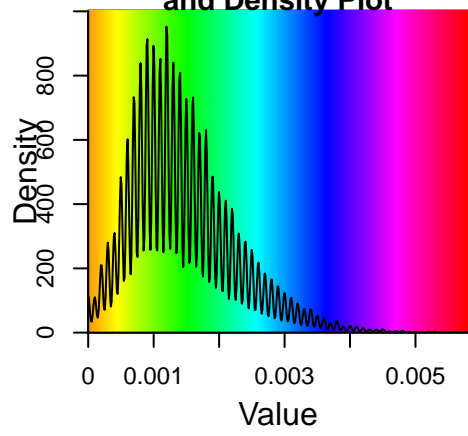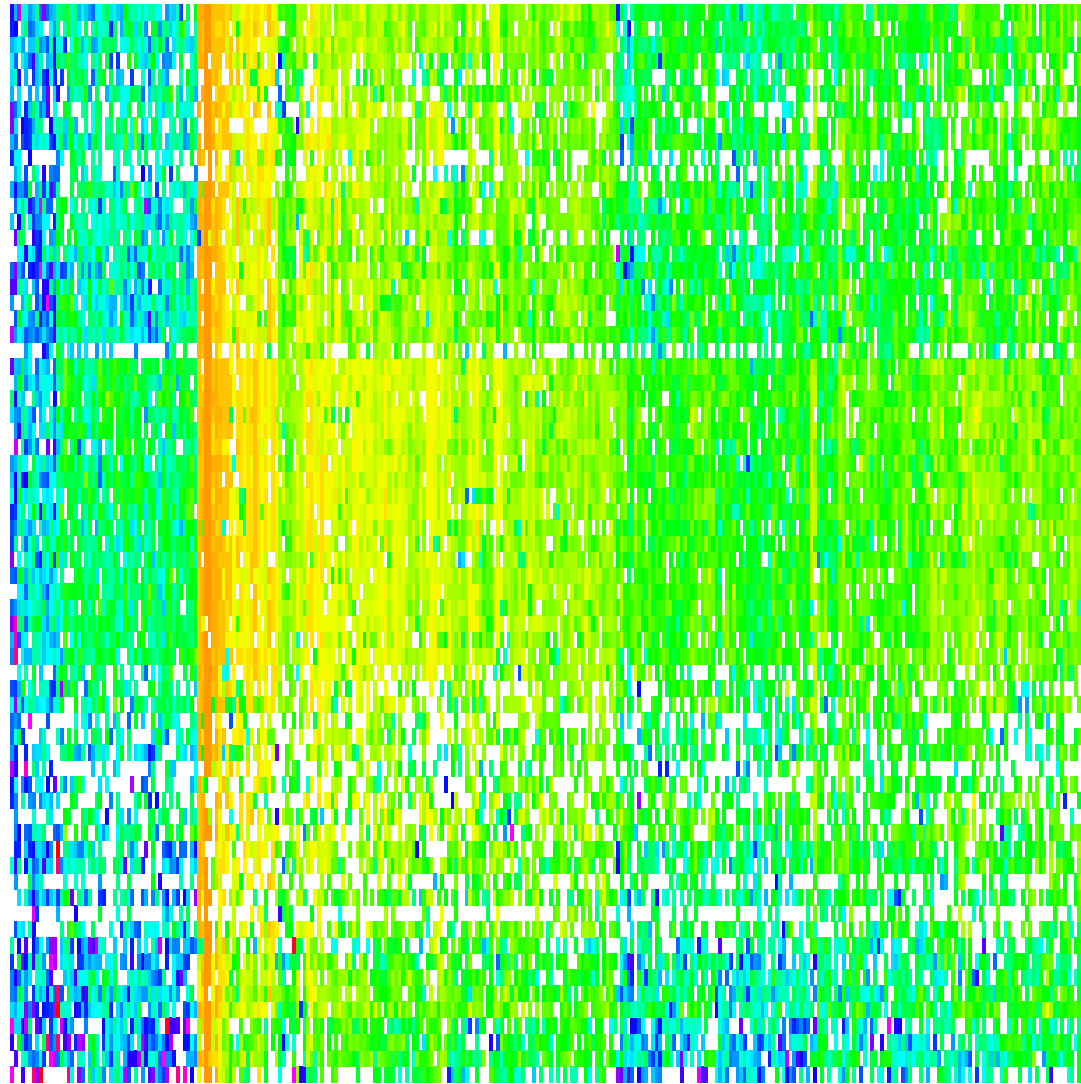

Trogulus  
 Ortholasma  
 Hesperonemastoma  
 Nipponopsalis  
 Ischyropsalis  
 Caddo\_pepperella  
 Theromaster  
 Protolophus  
 Leiobunum  
 Homalenotus  
 Odiellus  
 Forsteropsalis  
 Rakaia  
 Neopurcellia  
 Aoraki  
 Liphistius  
 Acropsopilio  
 Suzukielus  
 Metagovea  
 Brasilogovea  
 Siro  
 Parasiro  
 Escadabius  
 Metabiantes  
 Pellobunus  
 Zalmoxis  
 Pachylicus  
 Sclerobunus  
 Dampetrus  
 Sitalcina  
 Dibunus  
 Petrobunus  
 Synthetonychia  
 Gnomulus  
 Fumontana  
 Saramacia  
 Vonones  
 Phareicranus  
 Protimesius  
 Metagyndes  
 Fissiphallius  
 Larifuga  
 Avima  
 Metaibalonius  
 Thrasychirus  
 Sabacon  
 Stylocellidae  
 Gyas  
 Phalangium  
 Idzubius  
 Chapulobunus  
 Pseudopachylus  
 Pseudocellus  
 Ricinoides  
 Nemastomella  
 Eremobates  
 Dicranolasma  
 Metasiro  
 Ixodes  
 Peripatopsis\_long\_iso  
 Scutigera  
 Limulus  
 Centruroides  
 Daphnia  
 Anoplodactylus  
 Synsphyronus  
 Tetranychus

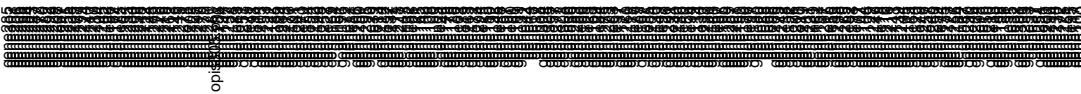

Supplement: rspb20162340supp2.pdf [file rspb20162340supp2.pdf]
