# Supplementary material for: The Opiliones tree of life: shedding light on harvestmen relationships through transcriptomics
Source: PubMed Central journal article supplement (PMC5326524; doi:10.1098/rspb.2016.2340), 2017-02-22

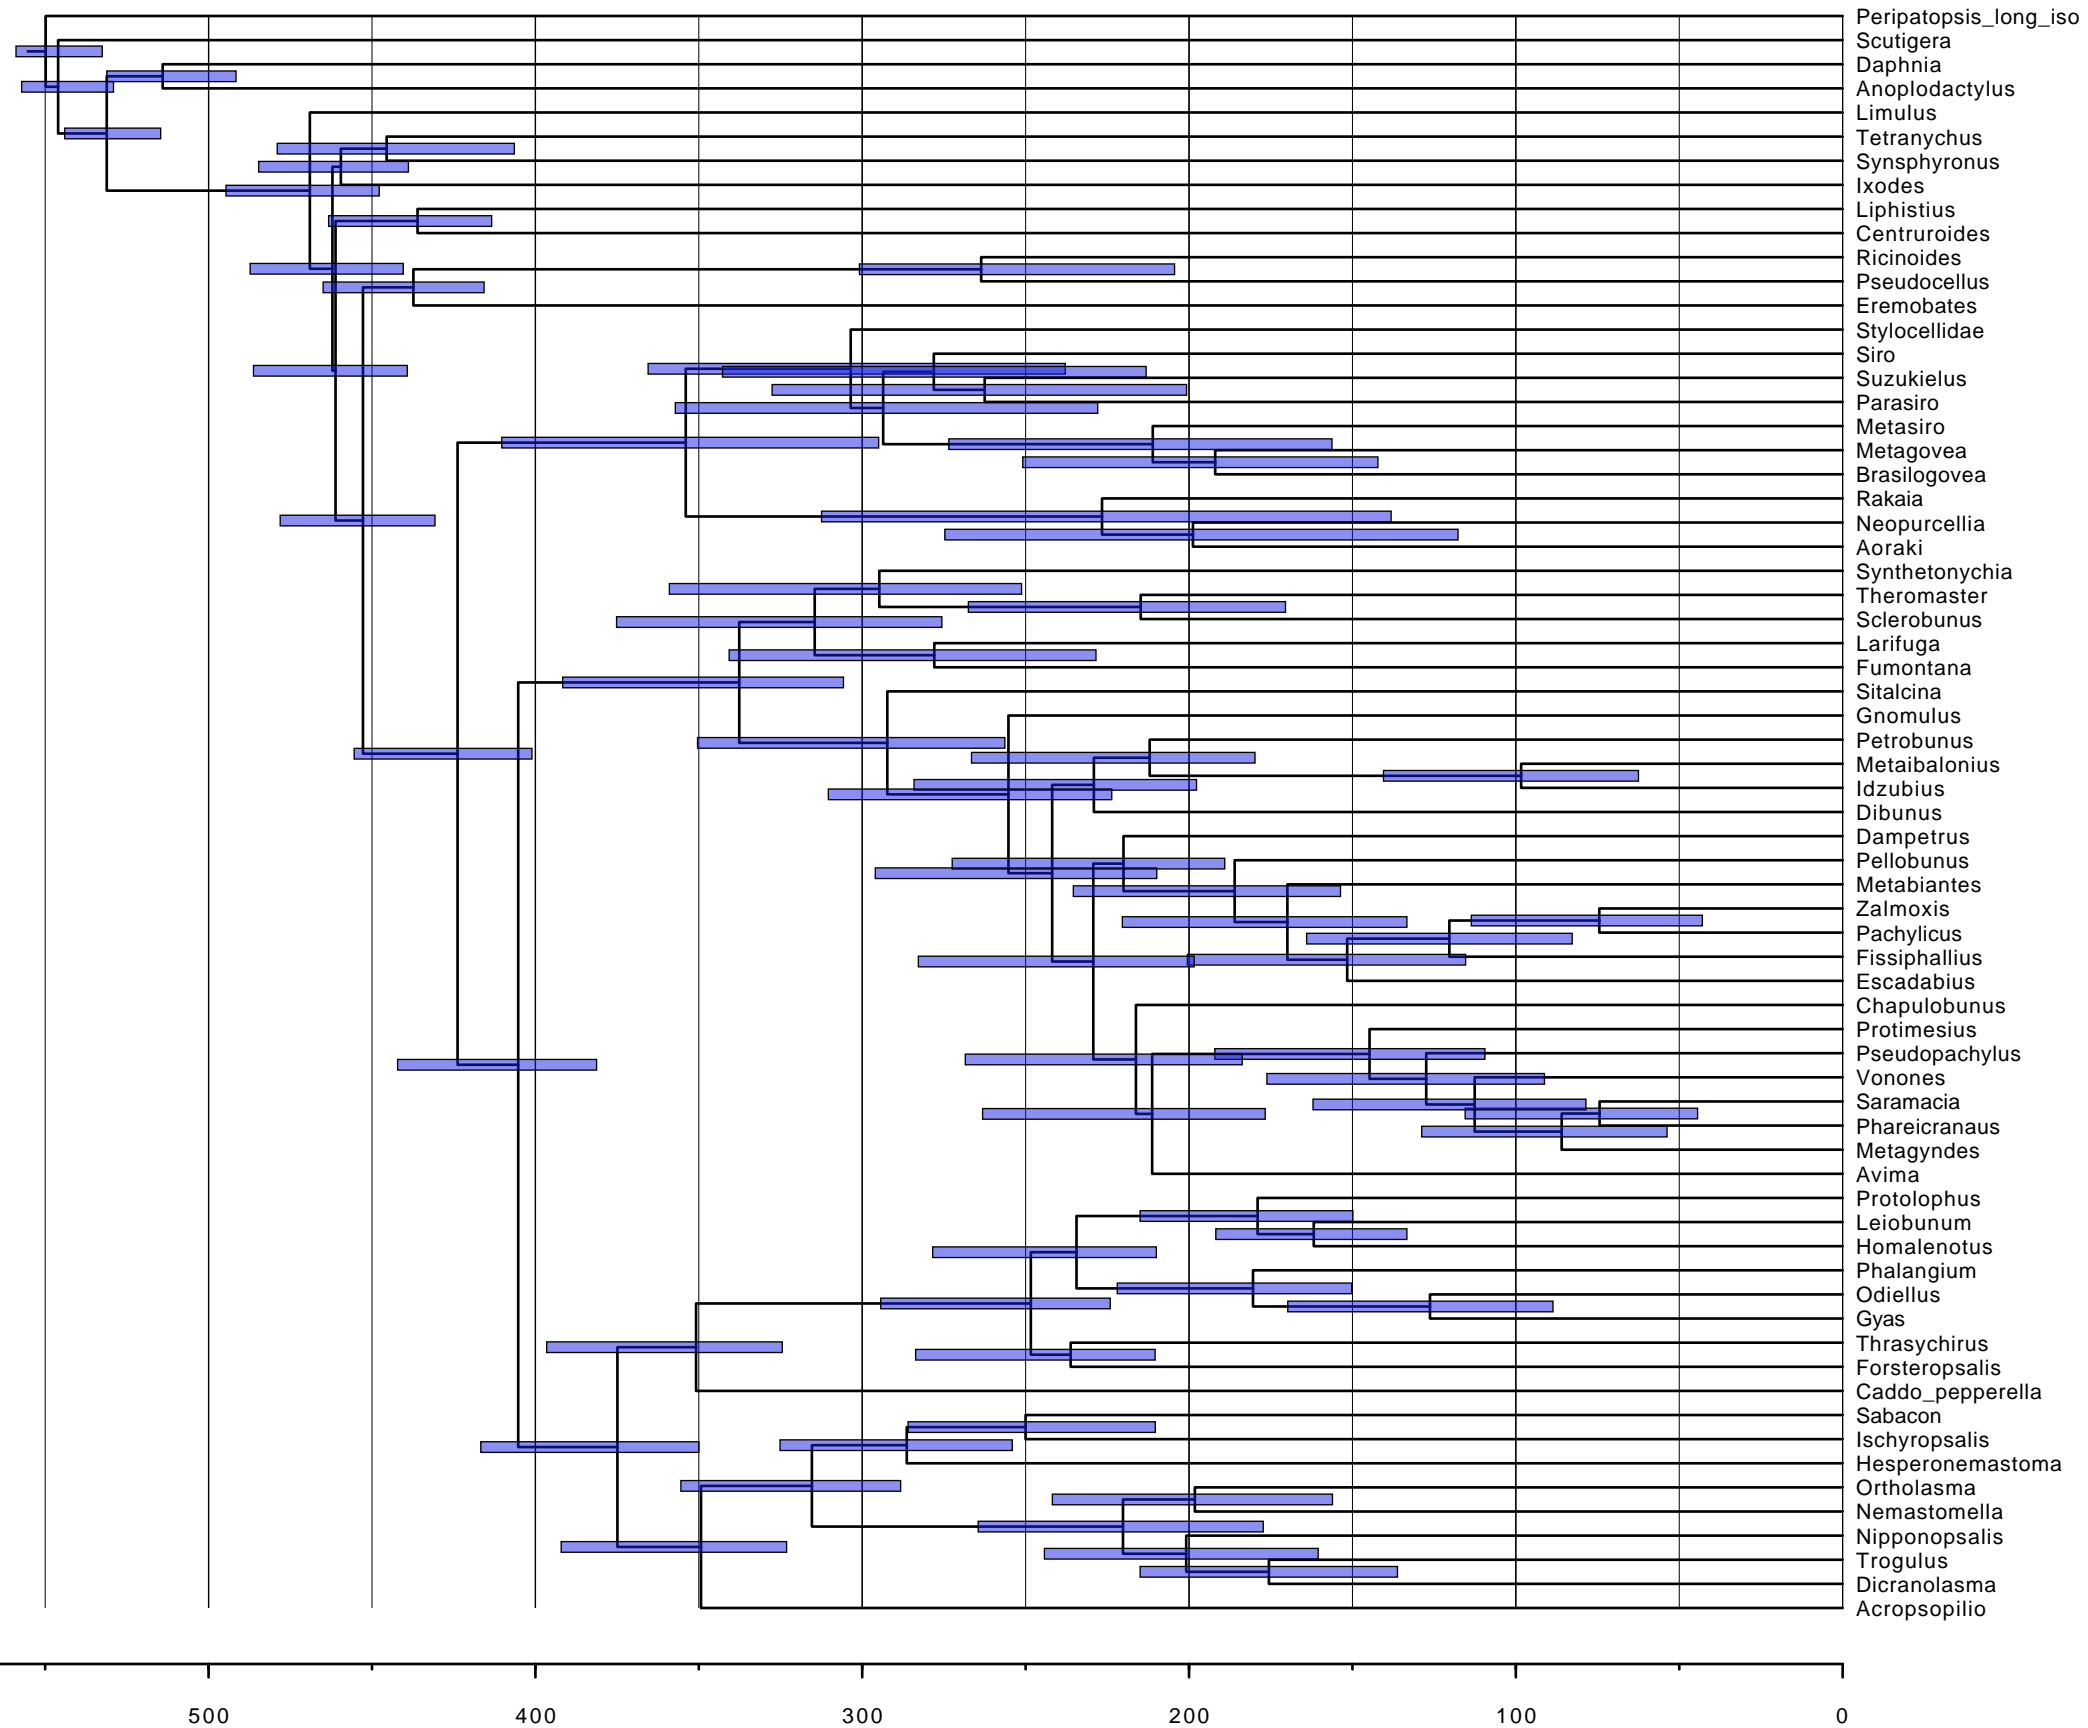

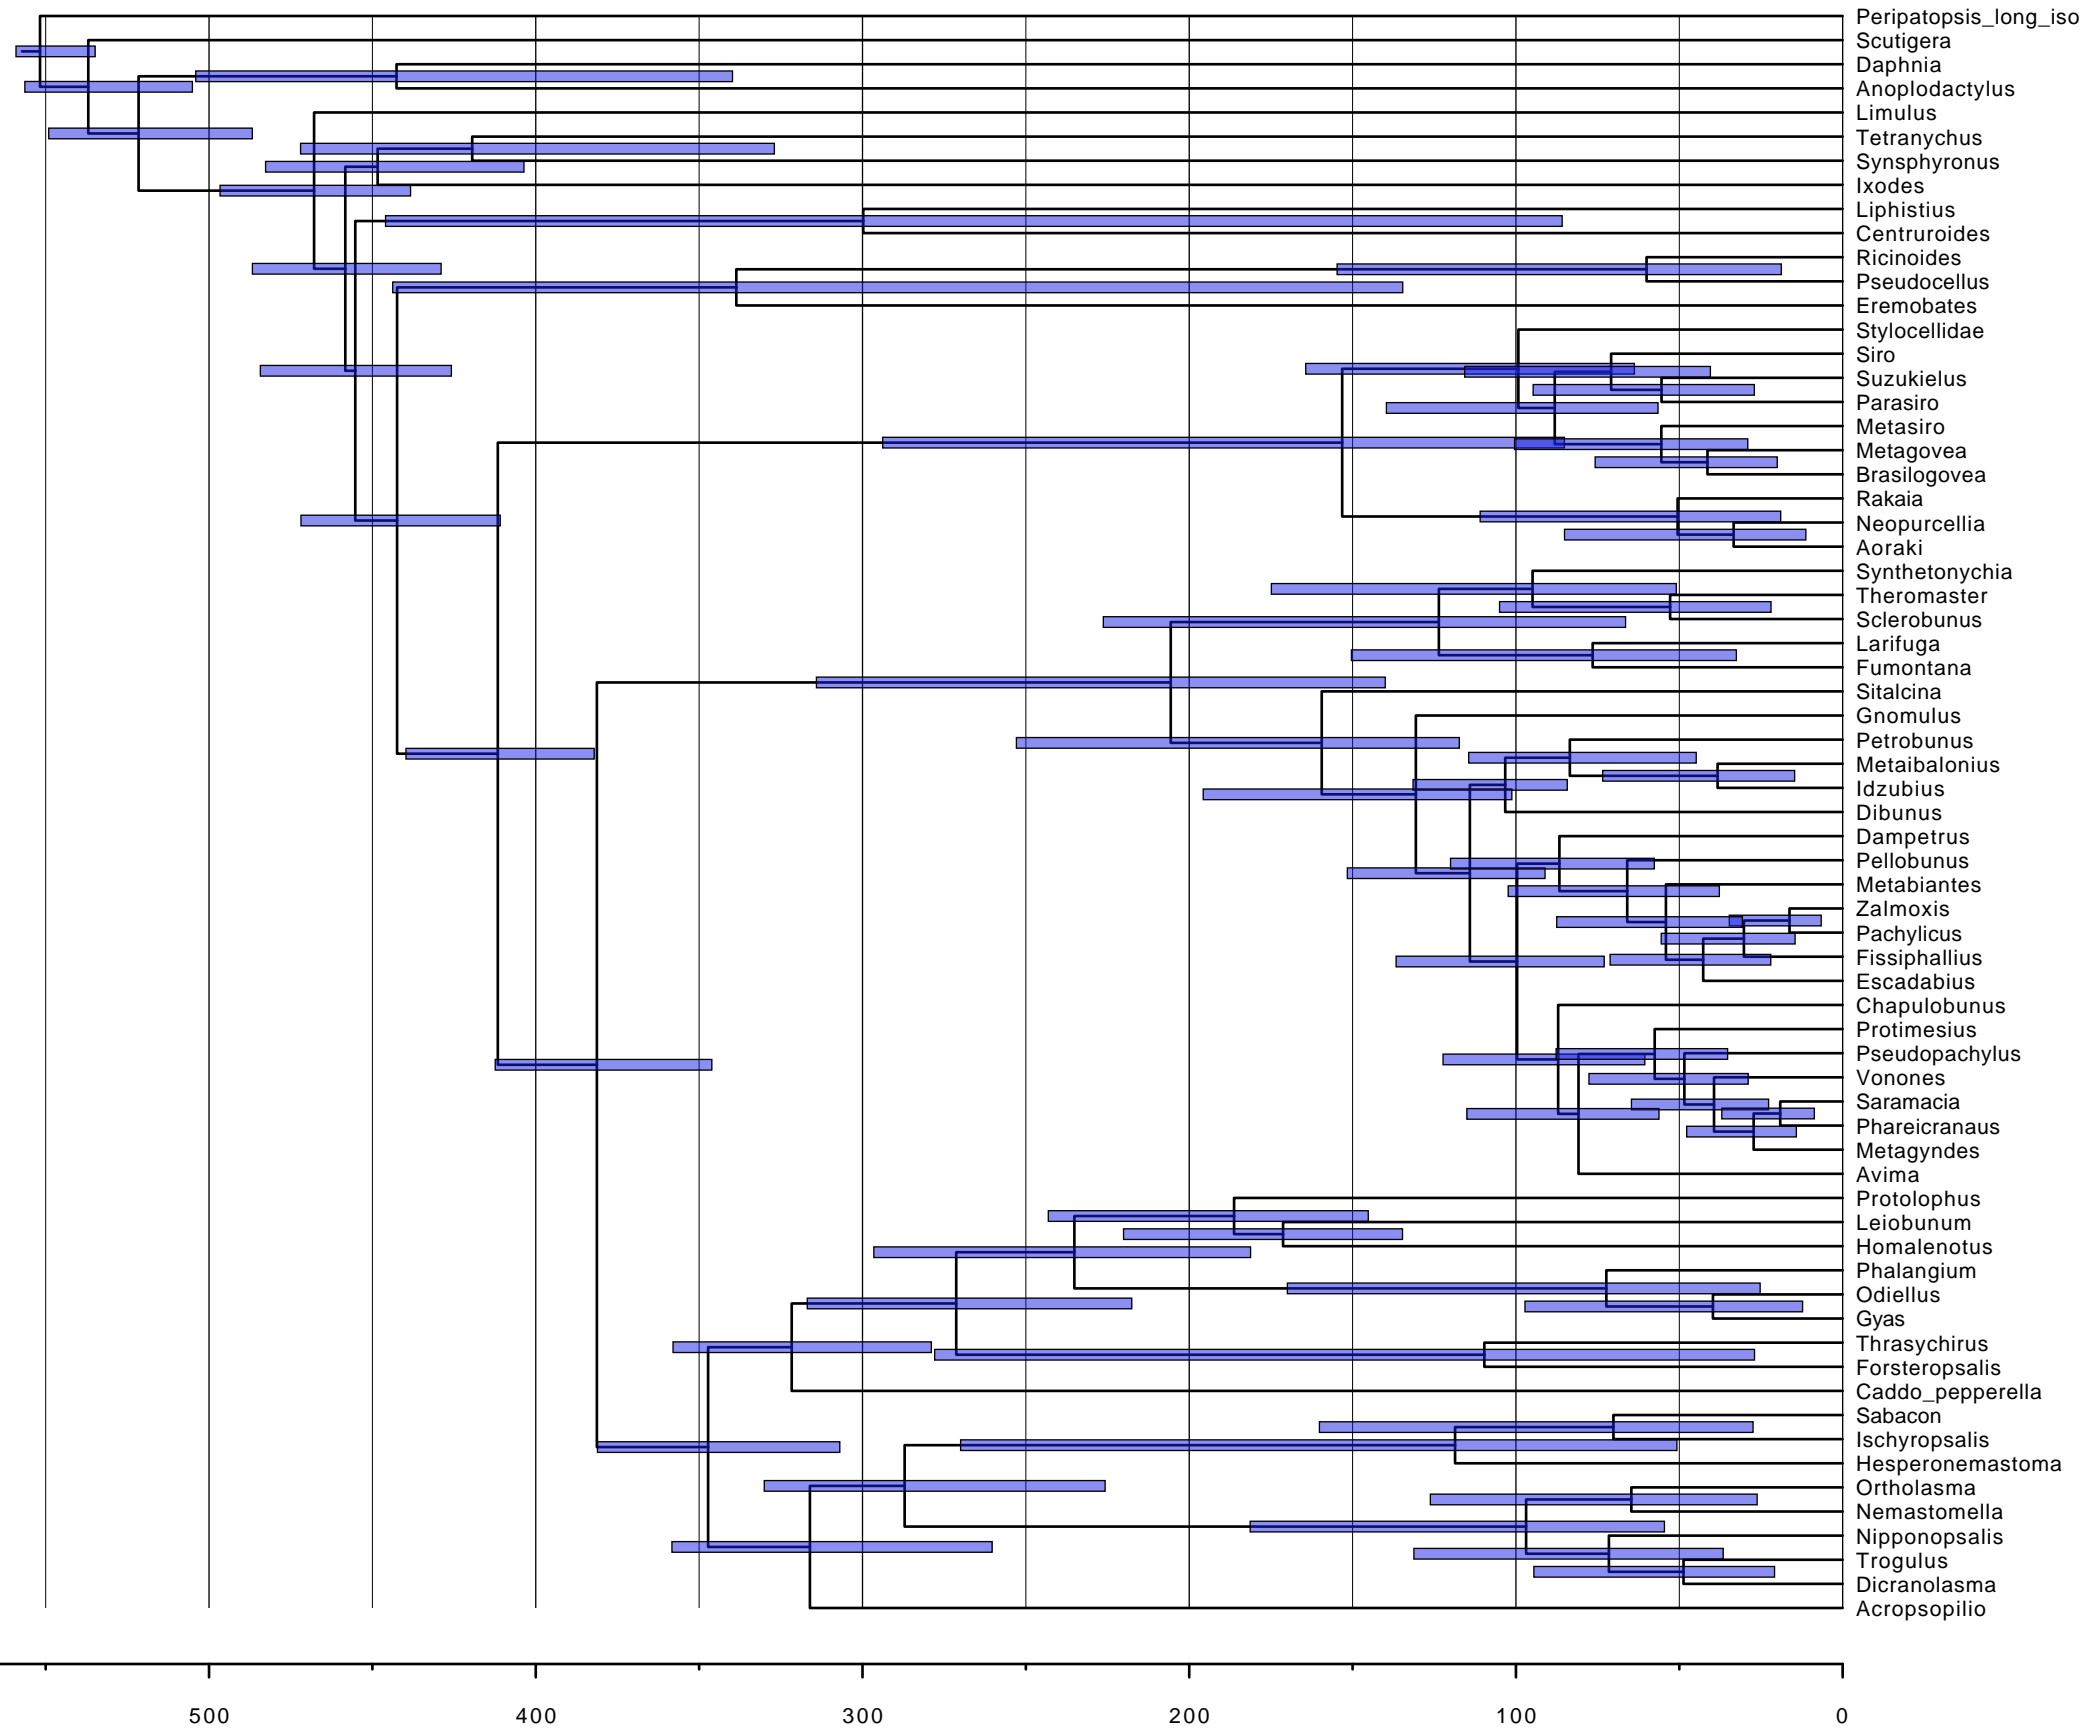

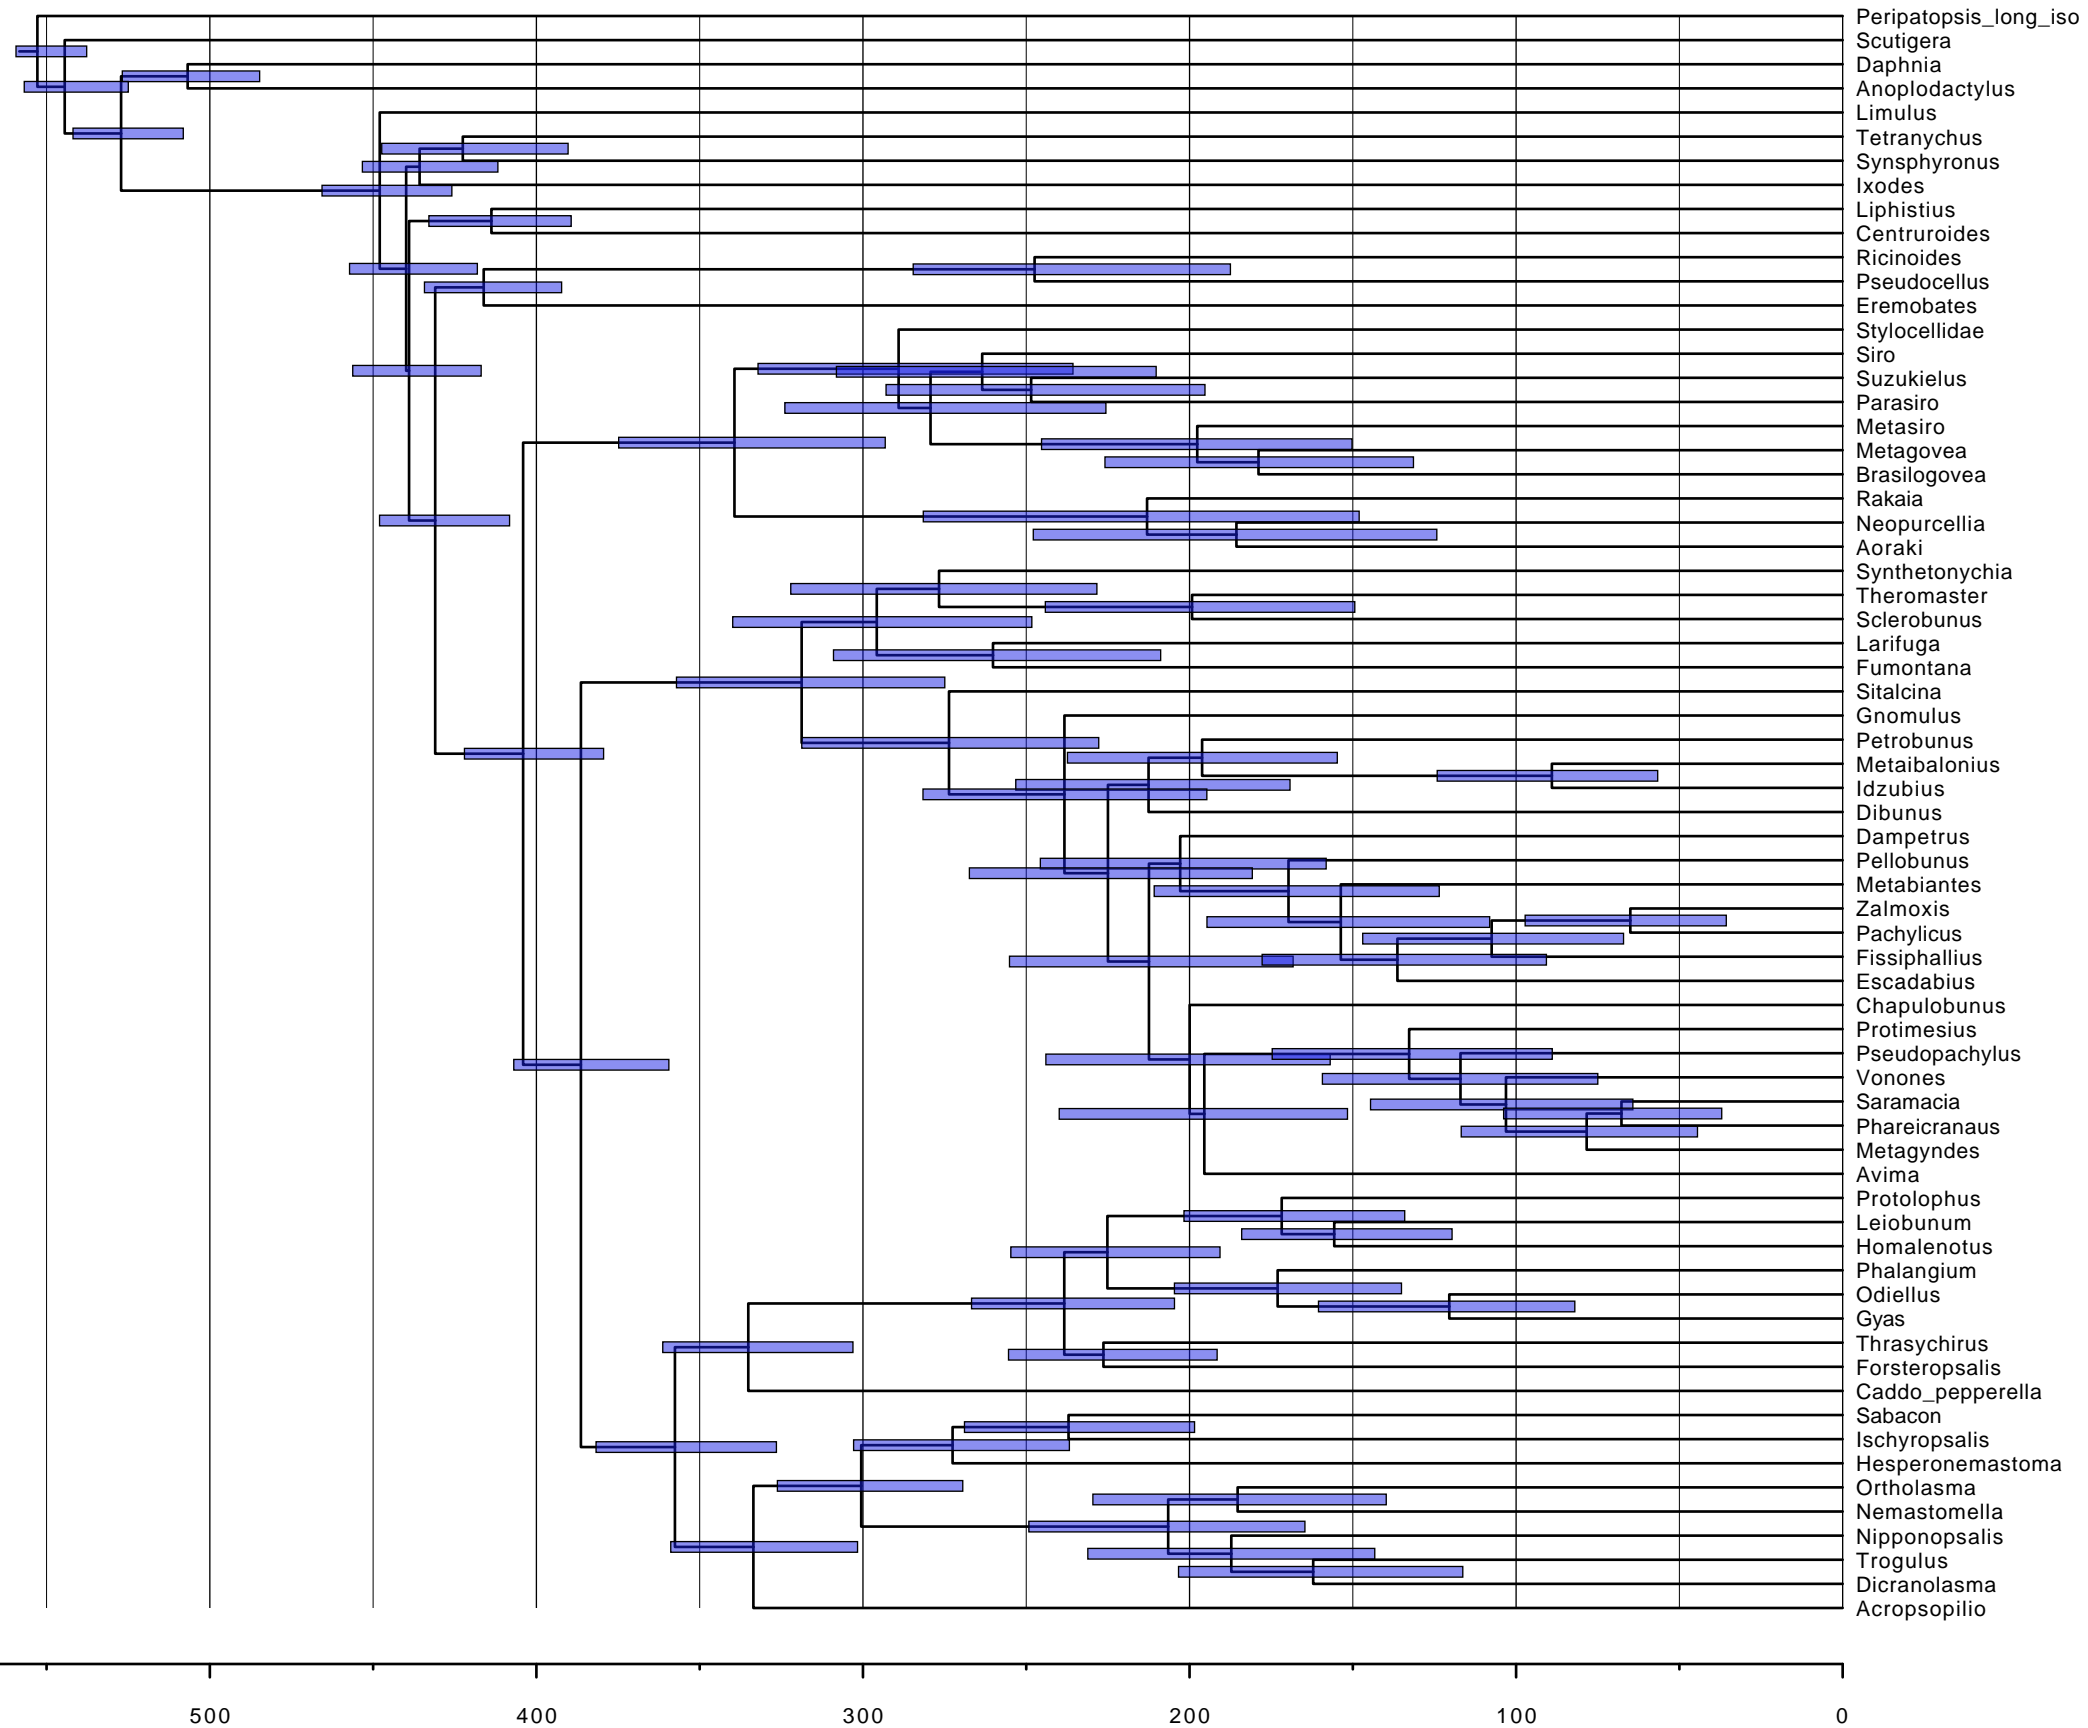

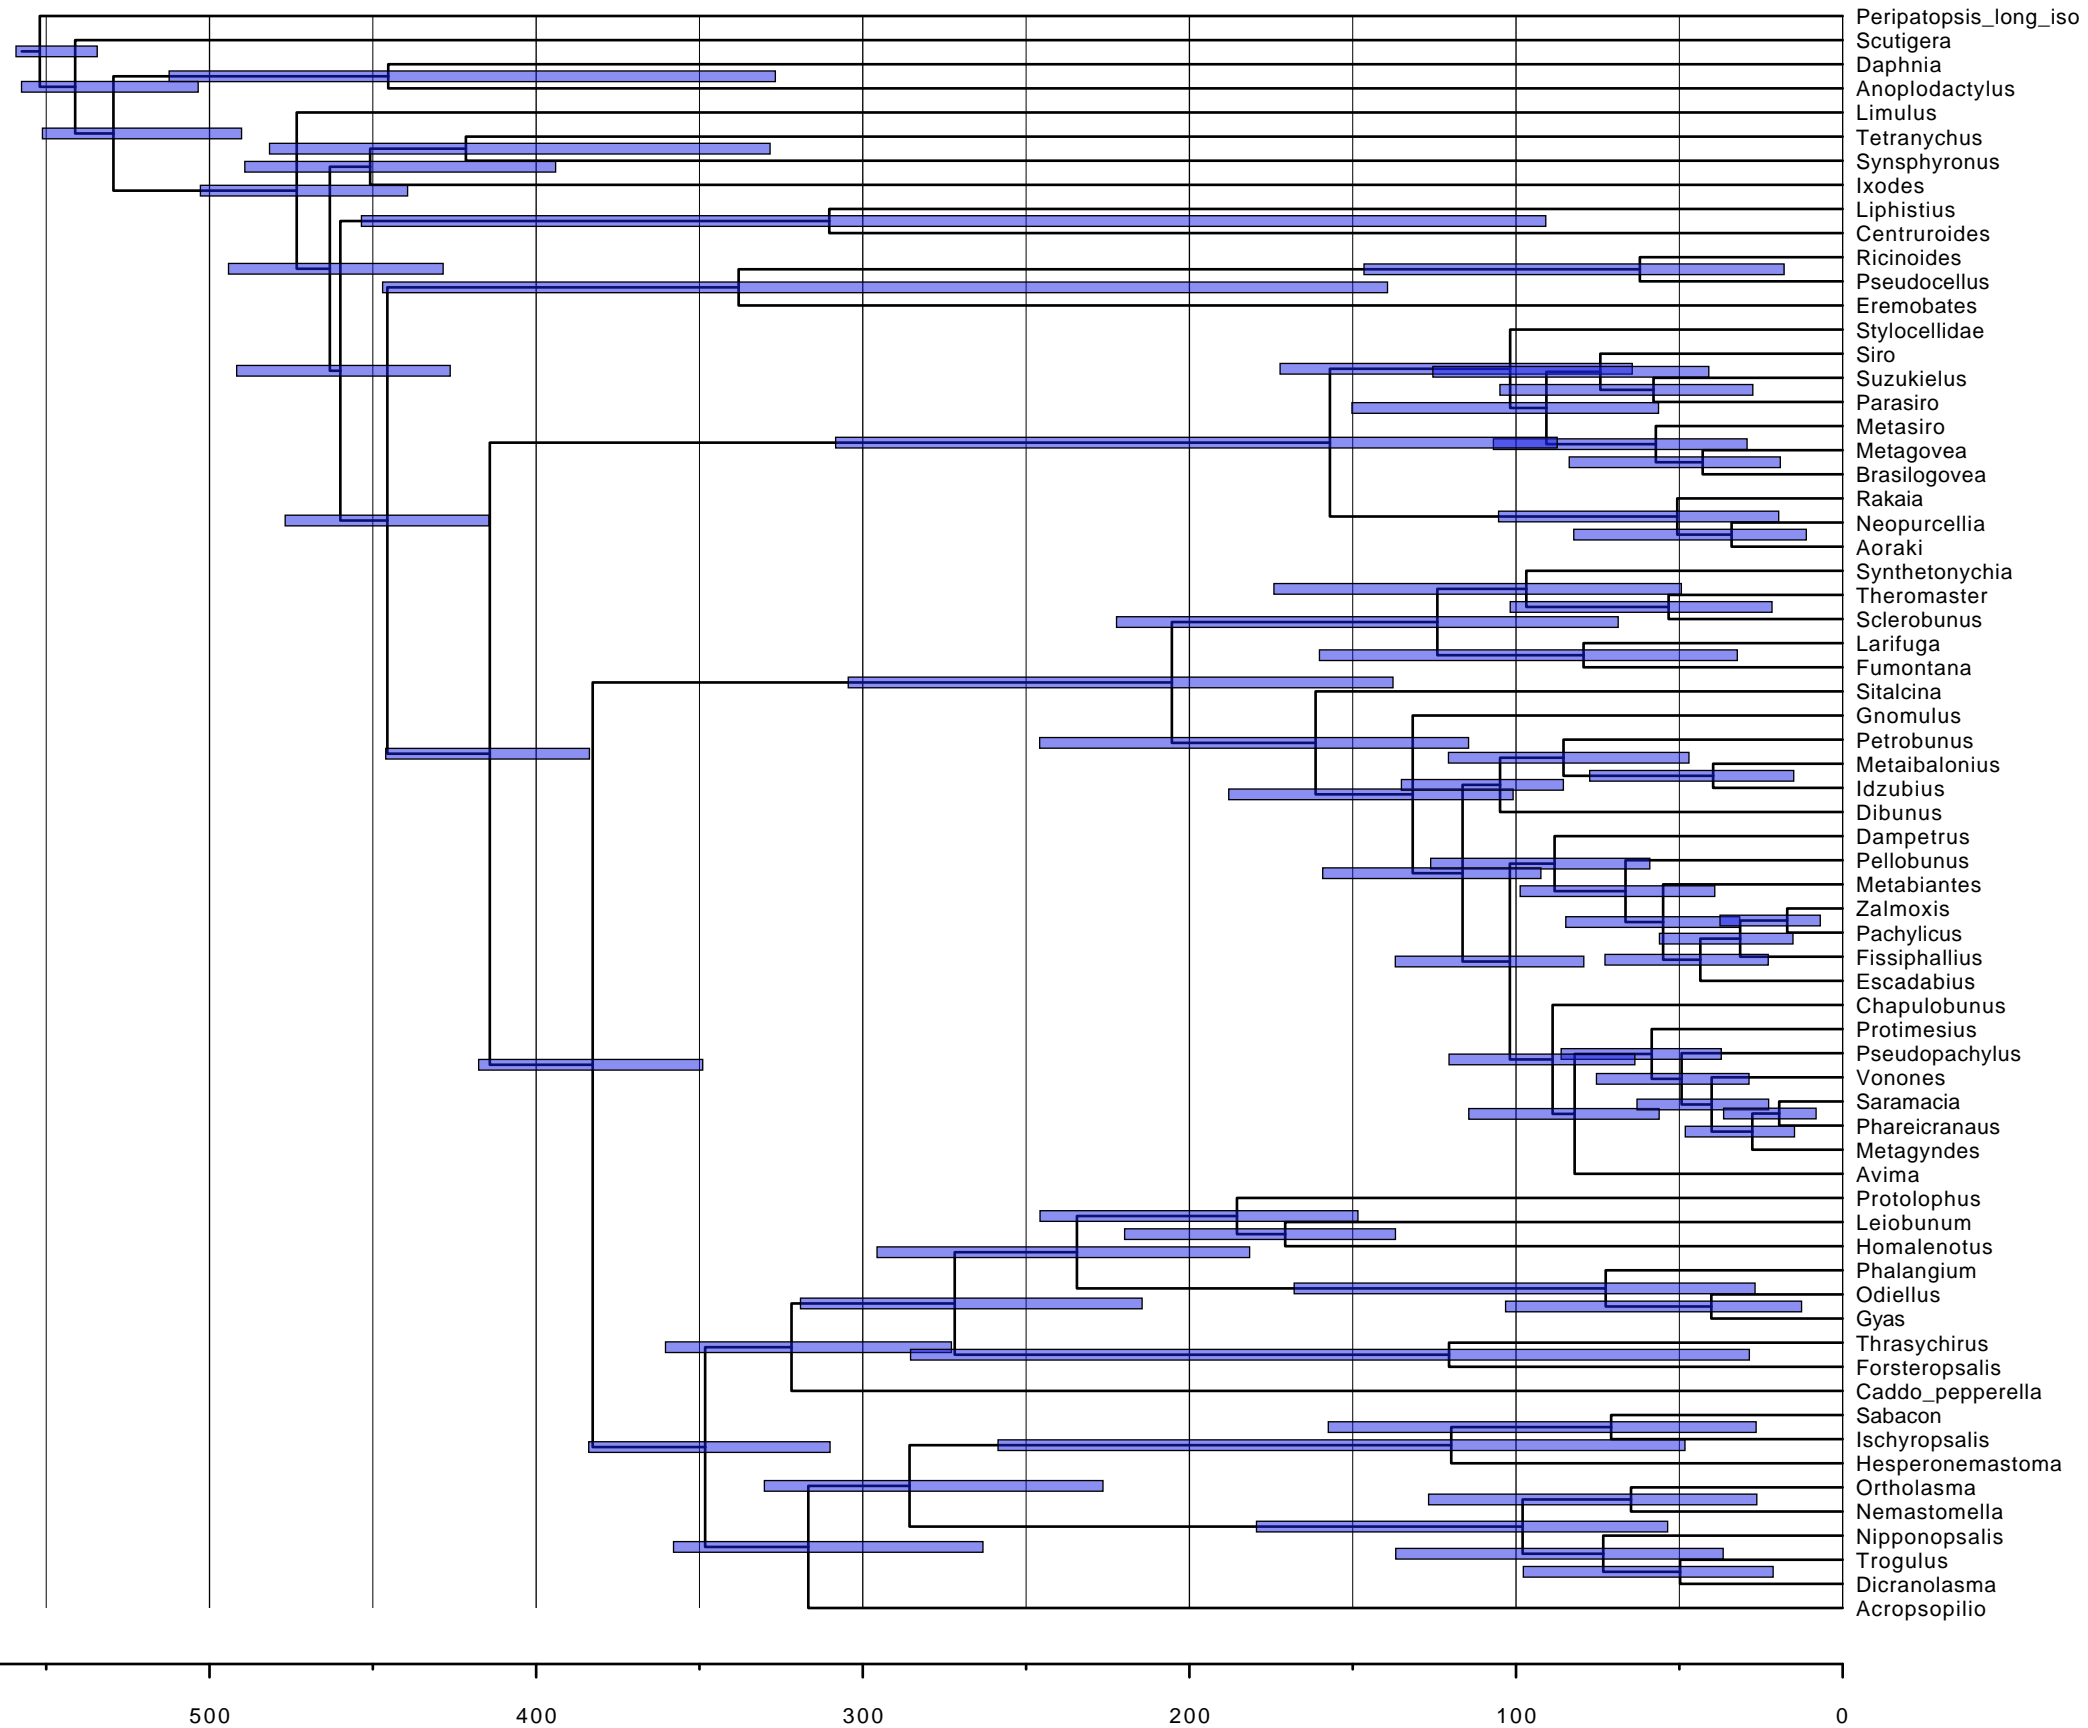

Supplement: rspb20162340supp3.pdf [file rspb20162340supp3.pdf]
