# Supplementary material for: The Opiliones tree of life: shedding light on harvestmen relationships through transcriptomics
Source: PubMed Central journal article supplement (PMC5326524; doi:10.1098/rspb.2016.2340), 2017-02-22
Supplement: rspb20162340supp4.pdf [file rspb20162340supp4.pdf]

| Family                         | Species                           | MCZ Acc # | SRA #        |
|--------------------------------|-----------------------------------|-----------|--------------|
| <b>CYPHOPHTHALMI</b>           |                                   |           |              |
| Pettalidae                     | <i>Aoraki longitarsa</i>          | IZ-137238 | SRR5181577   |
| Pettalidae                     | <i>Neopurcellia salmoni</i>       | IZ-29310  | SRR5181448   |
| Pettalidae                     | <i>Rakaia magna australis</i>     | IZ-29212  | SRR5181449   |
| Neogoveidae                    | <i>Brasilogovea microphaga</i>    | IZ-136559 | SRR5185916   |
| Neogoveidae                    | <i>Metagovea oviformis</i>        | IZ-136533 | SRR5230765   |
| Neogoveidae                    | <i>Metasiro savannahensis</i>     | IZ-134557 | SRX205297    |
| Stylocellidae                  | Stylocellidae n.sp.               | IZ-140867 | SRR5234539   |
| Sironidae                      | <i>Parasiro coifatti</i>          | IZ-43732  | SRR5235985   |
| Sironidae                      | <i>Siro boyerae</i>               | --        | SRX450933    |
| Sironidae                      | <i>Suzukielus sauteri</i>         | IZ-132257 | SRR5234546   |
| <b>EUPNOI</b>                  |                                   |           |              |
| Caddidae                       | <i>Caddo pepperella</i>           | IZ-40441  | SAMN06309539 |
| Neopilionidae                  | <i>Forsteropsalis pureora</i>     | IZ-29216  | SRR5234746   |
| Neopilionidae                  | <i>Thrasychirus gulosus</i>       | IZ-138161 | SRR5234747   |
| Phalangiidae                   | <i>Odiellus troguloides</i>       | IZ-43723  | SRR5234757   |
| Phalangiidae                   | <i>Phalangium opilio</i>          | IZ-29189  | SRR1145735   |
| Protolophidae                  | <i>Protolophus singularis</i>     | --        | SRX450934    |
| Sclerosomatidae                | <i>Gyas titanus</i>               | IZ-45502  | SRR5234758   |
| Sclerosomatidae                | <i>Homalenotus remyi</i>          | IZ-43715  | SRR5235983   |
| Sclerosomatidae                | <i>Leiobunum verrucosum</i>       | --        | SRX450936    |
| <b>DYSPNOI</b>                 |                                   |           |              |
| Acropsopilionidae              | <i>Acropsopilio neozealandiae</i> | IZ-30457  | SRR5235984   |
| Dicranolasmatidae              | <i>Dicranolasma soerenseni</i>    | IZ-43680  | SRR5235597   |
| Ischyropsalididae              | <i>Ischyropsalis nodifera</i>     | IZ-45501  | SRR5235484   |
| Nemastomatidae                 | <i>Ortholasma coronadense</i>     | --        | SRX451776    |
| Nemastomatidae                 | <i>Nemastomella dubia</i>         | IZ-43691  | SRR5235516   |
| Nipponopsalididae              | <i>Nipponopsalis abei</i>         | IZ-45632  | SRR5235518   |
| Sabaconidae                    | <i>Sabacon cavicolens</i>         | IZ-46883  | SAMN06309943 |
| Taracidae                      | <i>Hesperonemastoma</i>           | --        | SRX450937    |
| Trogulidae                     | <i>Trogulus martensi</i>          | --        | SRX450964    |
| <b>LANIATORES/INSIDIATORES</b> |                                   |           |              |
| Cladonychiidae                 | <i>Theromaster sp.</i>            | IZ-46878  | SRR5244184   |
| Synthetonychiidae              | <i>Synthetonychia glacialis</i>   | IZ-137212 | SRR5236909   |
| Travuniidae                    | <i>Sclerobunus robustus</i>       | --        | SRX647390    |
| Triaenonychidae                | <i>Larifuga capensis</i>          | IZ-49747  | SRR1145742   |
| Triaenonychidae                | <i>Fumontana deprehendor</i>      | IZ-46888  | SRR5236916   |
| <b>LANIATORES/GRASSATORES</b>  |                                   |           |              |
| Agoristenidae                  | <i>Avima matintaperera</i>        | IZ-136560 | SRR5241472   |
| Assamiidae                     | <i>Dampetrus sp.</i>              | IZ-140868 | SRR5242745   |
| Biantidae                      | <i>Metabiantes sp.</i>            | IZ-49748  | SRR1146667   |
| Cosmetidae                     | <i>Vonones ornata</i>             | IZ-49750  | SRR1145738   |
| Cranidae                       | <i>Phareicranaus manauara</i>     | IZ-136554 | SRR5241475   |
