# Supplementary material for: The Opiliones tree of life: shedding light on harvestmen relationships through transcriptomics
Source: PubMed Central journal article supplement (PMC5326524; doi:10.1098/rspb.2016.2340), 2017-02-22
Supplement: rspb20162340supp5.pdf [file rspb20162340supp5.pdf]

| Matrix \ Analysis                                     | PhyML-PCMA | ExaBayes | ExaML | PhyML-IL | PhyloBayes | Indiv. Gene trees for SuperQ | Dating root Opis LN | Dating root Opis UGAM | Dating root Cyphos LN | Dating root Cyphos UGAM | BaCoCa |
|-------------------------------------------------------|------------|----------|-------|----------|------------|------------------------------|---------------------|-----------------------|-----------------------|-------------------------|--------|
| 90% taxon occupancy (78 genes, 13,239 amino acids)    | X          | X        | X     | X        | X          | X                            | X                   | X                     | X                     | X                       | X      |
| 75% taxon occupancy (305 genes, 66,217 amino acids)   | -          | X        | X     | -        | X          | X                            | -                   | -                     | -                     | -                       | X      |
| 50% taxon occupancy (1550 genes, 425,716 amino acids) | -          | X        | X     | -        | -          | X                            | -                   | -                     | -                     | -                       | -      |
| 100 least conserved genes (21,877 amino acids)        | -          | X        | -     | -        | X          | X                            | -                   | -                     | -                     | -                       | X      |
| 100 middle genes (29,366 amino acids)                 | -          | -        | -     | X        | X          | X                            | -                   | -                     | -                     | -                       | X      |
| 100 most conserved (26,608 amino acids)               | X          | -        | -     | -        | X          | X                            | -                   | -                     | -                     | -                       | X      |
